# Supplementary material
Source: MDPI journal article supplement (https://www.mdpi.com/2077-0472/12/7/1053)
Supplement: s1 [file s1]

**Supporting information for:**

**Studying the effect of straw returning on the interspecific symbiosis of soil microbes based on carbon source utilization**

Yucui Ning<sup>1</sup>, Xu Wang<sup>1</sup>, Yanna Yang<sup>1</sup>, Xu Cao<sup>3</sup>, Yulong Wu<sup>1</sup>, Detang Zou<sup>2\*</sup>, Dongxing Zhou<sup>1\*</sup>

<sup>1</sup> College of Resources and Environmental Science, Northeast Agricultural University, Harbin 150030, China

<sup>2</sup> College of Agriculture, Northeast Agricultural University, Harbin 150030, China

<sup>3</sup> Institute of Microbiology, Heilongjiang Academy of Sciences, Harbin 150030, China

\*Corresponding author A: Dongxing Zhou

Email: zhoubooshi@neau.edu.cn

\*Corresponding author B: Detang Zou

Email: zoudtneau@126.com

Number of pages: 7

Number of tables: 4

Number of figures: 2

**Section S1. The distribution of carbon sources in ECO plates.**

|   | 1                                      | 2                                               | 3                                                | 4                                    |
|---|----------------------------------------|-------------------------------------------------|--------------------------------------------------|--------------------------------------|
| A | <b>Z0</b><br>water                     | <b>Z1</b><br>$\beta$ -methyl-D-glucoside        | <b>Z2</b><br>D-galactonic acid $\gamma$ -lactone | <b>Z3</b><br>L-arginine              |
| B | <b>Z4</b><br>pyruvic acid methyl ester | <b>Z5</b><br>D-xylose                           | <b>Z6</b><br>D-galacturonic acid                 | <b>Z7</b><br>L-asparagine            |
| C | <b>Z8</b><br>tween 40                  | <b>Z9</b><br>I-erythritol                       | <b>Z10</b><br>2-hydroxy benzoic acid             | <b>Z11</b><br>L-phenylalanine        |
| D | <b>Z12</b><br>tween 80                 | <b>Z13</b><br>D-mannitol                        | <b>Z14</b><br>4-hydroxy benzoic acid             | <b>Z15</b><br>L-serine               |
| E | <b>Z16</b><br>$\alpha$ -cyclodextrin   | <b>Z17</b><br>N-acetyl-D-glucosamine            | <b>Z18</b><br>$\gamma$ -hydroxybutyric acid      | <b>Z19</b><br>L-threonine            |
| F | <b>Z20</b><br>glycogen                 | <b>Z21</b><br>D-glucosaminic acid               | <b>Z22</b><br>itaconic acid                      | <b>Z23</b><br>glycyl-L-glutamic acid |
| G | <b>Z24</b><br>D-cellobiose             | <b>Z25</b><br>glucose-1-phosphate               | <b>Z26</b><br>$\alpha$ -ketobutyric acid         | <b>Z27</b><br>phenylethyl-amine      |
| H | <b>Z28</b><br>$\alpha$ -D-lactose      | <b>Z29</b><br>D,L- $\alpha$ -glycerol phosphate | <b>Z30</b><br>D-malic acid                       | <b>Z31</b><br>putrescine             |

**Section S2. The straw amount in each experimental plot (1 m<sup>2</sup>).**Table S1. Test design (1 m<sup>2</sup>).

| Treatments | Code value       |                  |                  | Actual value       |                                  |                          |
|------------|------------------|------------------|------------------|--------------------|----------------------------------|--------------------------|
|            | Test factor<br>A | Test factor<br>B | Test factor<br>C | Straw length<br>cm | Straw amount<br>g/m <sup>2</sup> | Straw buried depth<br>cm |
| 1          | 1                | 1                | 1                | 20                 | 850                              | 20                       |
| 2          | 1                | 1                | -1               | 20                 | 850                              | 10                       |
| 3          | 1                | -1               | 1                | 20                 | 350                              | 20                       |
| 4          | 1                | -1               | -1               | 20                 | 350                              | 10                       |
| 5          | -1               | 1                | 1                | 10                 | 850                              | 20                       |
| 6          | -1               | 1                | -1               | 10                 | 850                              | 10                       |
| 7          | -1               | -1               | 1                | 10                 | 350                              | 20                       |
| 8          | -1               | -1               | -1               | 10                 | 350                              | 10                       |
| 9          | 1.682            | 0                | 0                | 25                 | 600                              | 15                       |
| 10         | -1.682           | 0                | 0                | 5                  | 600                              | 15                       |
| 11         | 0                | 1.682            | 0                | 15                 | 1000                             | 15                       |
| 12         | 0                | -1.682           | 0                | 15                 | 200                              | 15                       |
| 13         | 0                | 0                | 1.682            | 15                 | 600                              | 25                       |
| 14         | 0                | 0                | -1.682           | 15                 | 600                              | 5                        |
| 15         | 0                | 0                | 0                | 15                 | 600                              | 15                       |

According to the three factors five levels quadratic orthogonal rotation experimental design, fifteen groups of experiments were carried out.

**Section S3. The changes of straw decomposition rates accrued by the interaction of straw amount and buried delth.**

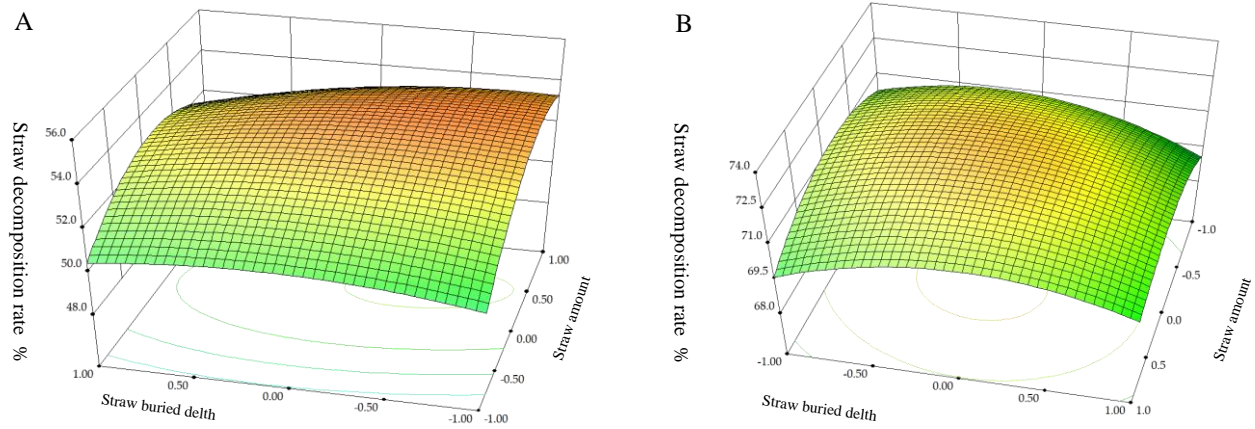

Figure S1. Straw decomposition rate caused by straw amount and buried delth.

A: 150 days of straw returning; B: (A+150) days of straw returning

**Section S4. The changes of straw decomposition rates accrued by the interaction of straw length and buried delth.**

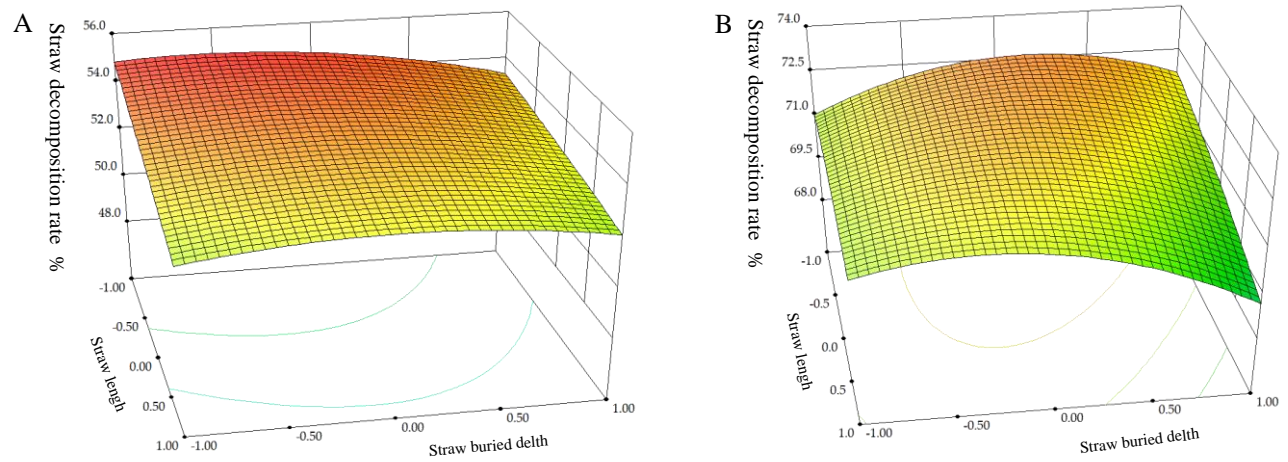

Figure S2. Straw decomposition rate caused by straw length and buried delth.

A: 150 days of straw returning; B: (A+150) days of straw returning

**Section S5. The partial results of path analysis.**

Table S2. The determination coefficient and residual path coefficient of PA.

| Time<br>(day) | One year decomposition period |                              | Two year decomposition period |                              |
|---------------|-------------------------------|------------------------------|-------------------------------|------------------------------|
|               | Determination<br>coefficient  | Residual path<br>coefficient | Determination<br>coefficient  | Residual path<br>coefficient |
| 30<br>A+30    | 0.988                         | 0.111                        | 0.975                         | 0.158                        |
| 60<br>A+60    | 0.967                         | 0.182                        | 0.977                         | 0.153                        |
| 90<br>A+90    | 0.984                         | 0.126                        | 0.986                         | 0.118                        |
| 120<br>A+120  | 0.969                         | 0.176                        | 0.969                         | 0.175                        |
| 150<br>A+150  | 0.973                         | 0.164                        | 0.987                         | 0.116                        |

## Section S6. The meteorological conditions of the experimental site.

Table S3. The meteorological conditions of the experimental site during the test.

| Year | Month | Average temperature<br>°C | Average maximum temperature<br>°C | Average minimum temperature<br>°C | Average rainfall<br>mm | Average sunshine time<br>hour |
|------|-------|---------------------------|-----------------------------------|-----------------------------------|------------------------|-------------------------------|
| 2019 | Jan   | -14.4                     | -7.6                              | -20.2                             | 2.4                    | 172.8                         |
|      | Feb   | -10.2                     | -2.9                              | -16.9                             | 0.3                    | 179.9                         |
|      | Mar   | -0.3                      | 7.1                               | -7.4                              | 11.5                   | 240.8                         |
|      | Apr   | 7.5                       | 14.9                              | 0.2                               | 13.4                   | 266.6                         |
|      | May   | 15.1                      | 22.3                              | 8.8                               | 105.8                  | 240.5                         |
|      | June  | 19.1                      | 24.4                              | 14.1                              | 106.8                  | 272.0                         |
|      | July  | 23.2                      | 28.0                              | 19.3                              | 215.3                  | 250.8                         |
|      | Aug   | 20.2                      | 24.3                              | 17.2                              | 250.1                  | 180.9                         |
|      | Sep   | 15.8                      | 23.0                              | 9.3                               | 104.8                  | 289.0                         |
|      | Oct   | 7.2                       | 14.5                              | 0.7                               | 9.5                    | 238.9                         |
|      | Nov   | -5.9                      | -0.7                              | -10.8                             | 17.7                   | 200.4                         |
|      | Dec   | -16.2                     | -10.9                             | -21.4                             | 23.8                   | 184.7                         |
| 2020 | Jan   | -17.4                     | -10.7                             | -23.4                             | 2.4                    | 213.9                         |
|      | Feb   | -12.3                     | -6.2                              | -18.7                             | 12.6                   | 227.5                         |
|      | Mar   | -1.4                      | 4.2                               | -6.8                              | 9.4                    | 287.0                         |
|      | Apr   | 6.5                       | 13.3                              | -0.4                              | 16.9                   | 301.6                         |
|      | May   | 15.1                      | 21.4                              | 9.1                               | 77.3                   | 306.7                         |
|      | June  | 19.2                      | 24.3                              | 15.0                              | 171.4                  | 280.6                         |
|      | July  | 23.7                      | 29.2                              | 18.7                              | 71.2                   | 349.3                         |
|      | Aug   | 21.2                      | 26.1                              | 17.3                              | 209.3                  | 251.5                         |
|      | Sep   | 15.8                      | 20.5                              | 12.1                              | 194.2                  | 205.3                         |
|      | Oct   | 6.2                       | 12.3                              | 0.9                               | 24.3                   | 223.3                         |
|      | Nov   | -4.7                      | 0.3                               | -9.4                              | 36.6                   | 188.5                         |
|      | Dec   | -16.8                     | -11.4                             | -21.7                             | 2.0                    | 212.7                         |

The data comes from Harbin Meteorological Bureau
